# Supplementary material for: Identification of significant genes signatures and prognostic biomarkers in cervical squamous carcinoma via bioinformatic data
Source: PeerJ. 2020 Dec 2;8:e10386. doi: 10.7717/peerj.10386 (PMC7718800; doi:10.7717/peerj.10386)
Supplement: Supplemental Information 4 [file peerj-08-10386-s004.xlsx]

## Sheet: I、Ⅱ
	sample	gene	gapdh	β-actin	RCF4	CT-adjust	-ΔΔCt	2^-ΔΔCt	Pathological stage
1	9	gapdh	17.835	15.485	24.5333	6.69833	-1.50419	0.352527	CESC IB3
2	11	gapdh	16.515	14.42	21.6833	5.16833	0.0258067	1.01805	CESC IB3
3	19	gapdh	17.5	14.71	22.0867	4.58667	0.607473	1.52359	CESC IIA1
4	25	gapdh	16.515	14.07	20.6067	4.09167	1.10247	2.14722	CESC IB1
5	29	gapdh	15.67	13.495	18.23	2.56	2.63414	6.20805	CESC IB2
6	31	gapdh	17.26	14.7	20.7367	3.47667	1.71747	3.2886	CESC IB2
7	33	gapdh	17.475	14.625	21.49	4.015	1.17914	2.26442	CESC IB1
8	61	gapdh	15.785	14.11	18.6667	2.88167	2.31247	4.96734	CESC IB2
9	51	gapdh	17.165	14.635	21.6033	4.43833	0.755807	1.68858	CESC IB2
10	67	gapdh	17.985	15.815	21.11	3.125	2.06914	4.19636	CESC IIA2
11	57	gapdh	16.485	15.06	19.6967	3.21167	1.98247	3.9517	CESC IIA1
12	71	gapdh	15.93	16.1	19.7467	3.81667	1.37747	2.59813	CESC IB2
13	1	gapdh	16.4	15.11	21.1633	4.76333	0.430807	1.34799	CESC IB3
14	17	gapdh	21.16	18.765	24.83	3.67	1.52414	2.87615	CESC IIA1
15	35	gapdh	18.795	16.245	21.9967	3.20167	1.99247	3.97919	CESC IB1
16	37	gapdh	25.525	23.77	30.0367	4.51167	0.682473	1.60489	CESC IB1
17	45	gapdh	21.935	19.885	25.4367	3.50167	1.69247	3.2321	CESC IB2
18	65	gapdh	16.67	16.87	20.19	3.52	1.67414	3.19129	CESC IB2

## Sheet: Ⅲ
	sample	gene	gapdh	β-actin	RCF4	CT-adjust	-ΔΔCt	2^-ΔΔCt	Pathological stage
1	3	gapdh	16.8	14.66	21.4667	4.66667	0.527473	1.4414	CESC IIIC1
2	13	gapdh	16.365	14.495	21.2067	4.84167	0.352473	1.27675	CESC IIIC1
3	15	gapdh	17.71	16.105	21.6433	3.93333	1.26081	2.3963	CESC IIIC1
4	23	gapdh	16.415	13.825	21.1267	4.71167	0.482473	1.39714	CESC IIIC1
5	47	gapdh	15.68	14.465	19.4467	3.76667	1.42747	2.68975	CESC IIIC1
6	55	gapdh	18.875	15.565	25.02	6.145	-0.95086	0.517324	CESC IIIC1
7	59	gapdh	18.77	15.63	24.1433	5.37333	-0.179193	0.883197	CESC IIIC1
8	49	gapdh	17.425	14.615	23	5.575	-0.38086	0.76798	CESC IIIC1
9	63	gapdh	14.17	15.315	18.84	4.67	0.52414	1.43808	CESC IIIC1
10	53	gapdh	18.265	18.64	24.92	6.655	-1.46086	0.363277	CESC IIIC1
11	69	gapdh	16.575	14.945	20.2167	3.64167	1.55247	2.9332	CESC IIIC1
12	43	gapdh	20.375	18.48	26.0833	5.70833	-0.514193	0.700184	CESC IIIC1
13	5	gapdh	18.72	15.945	24.6767	5.95667	-0.762527	0.589463	CESC IIIC1
14	7	gapdh	16.44	15.53	22.81	6.37	-1.17586	0.44262	CESC IIIC1
15	21	gapdh	19.465	16.015	25.4867	6.02167	-0.827527	0.563494	CESC IIIC1
16	39	gapdh	19.39	18.485	26.0133	6.62333	-1.42919	0.371338	CESC IIIC1
17	41	gapdh	22.36	19.46	26.35	3.99	1.20414	2.304	CESC IIIC1
